# Supplementary material
Source: HighWire-hosted journal article supplement (https://bjo.bmj.com/content/bjo-2023-325044)
Supplement: inline-supplementary-material-1 [file inline-supplementary-material-1.pdf]

Supplementary material

Supplementary Table 1. UK Biobank showcase variables used in the paper.

| Measurements                                          | Field ID                     | Time                                                                                | Description                                                                                                                                                                           |
|-------------------------------------------------------|------------------------------|-------------------------------------------------------------------------------------|---------------------------------------------------------------------------------------------------------------------------------------------------------------------------------------|
| Incident retinal vascular occlusion and stroke events |                              |                                                                                     |                                                                                                                                                                                       |
| Incident retinal artery occlusion                     | 41270 (code H340-H342)       | From the date of baseline assessment to the date of onset retinal artery occlusion  | Hospital in-patient records with retinal artery occlusion as main or any secondary diagnoses based on the 10th edition of the WHO International Classification of Diseases (ICD-10).  |
| Incident ischemic stroke                              | 41270 (code I63)             | From the date of baseline assessment to the date of onset stroke                    | Hospital in-patient records with ischemic stroke as main or any secondary diagnoses based on the 10th edition of the WHO International Classification of Diseases (ICD-10).           |
| Incident transient ischemic attack                    | 41270 (code G45, G458, G459) | From the date of baseline assessment to the date of onset transient ischemic attack | Hospital in-patient records with transient ischemic attack as main or any secondary diagnoses based on the 10th edition of the WHO International Classification of Diseases (ICD-10). |
| Risk factors                                          |                              |                                                                                     |                                                                                                                                                                                       |
| High-sensitivity C-reactive protein                   | 30710                        | Baseline assessment                                                                 | Blood high-sensitivity C-reactive protein level Measured by enzymatic methodology on a Beckman Coulter AU5800 (mg/L).                                                                 |
| Smoking status                                        | 20116                        | Baseline assessment                                                                 | This field summarizes the current/past smoking status of the participant.                                                                                                             |

|                                 |                         |                     |                                                                                                                                                                        |
|---------------------------------|-------------------------|---------------------|------------------------------------------------------------------------------------------------------------------------------------------------------------------------|
| <b>Alcohol drinker status</b>   | 20117                   | Baseline assessment | This field summarizes the current/past alcohol drinker status of the participant.                                                                                      |
| <b>Diabetes mellitus</b>        | 2443                    | Baseline assessment | Doctor-diagnosed diabetes mellitus. Touchscreen question "Has a doctor ever told you that you have diabetes?"                                                          |
|                                 | 20003                   |                     | The use of anti-hyperglycemic medications.                                                                                                                             |
|                                 | 6153 (code 3)           |                     | The use of insulin.                                                                                                                                                    |
|                                 | 30750                   |                     | Glycated hemoglobin level measured by HPLC analysis on a Bio-Rad VARIANT II Turbo ( $\geq 48$ mmol/mol).                                                               |
| <b>Hypertension</b>             | 20002 (code 1065, 1072) | Baseline assessment | Self-reported hypertension.                                                                                                                                            |
|                                 | 6153 (code 2)           |                     | Use of antihypertensive drugs.                                                                                                                                         |
|                                 | 4080                    |                     | Average systolic blood pressure of at least 130mmHg.                                                                                                                   |
|                                 | 4079                    |                     | Average diastolic blood pressure of at least 80mmHg.                                                                                                                   |
| <b>Hyperlipidemia</b>           | 20002 (code 1473)       | Baseline assessment | Self-reported hyperlipidemia.                                                                                                                                          |
|                                 | 6153                    |                     | The use of statins.                                                                                                                                                    |
|                                 | 20003                   |                     | The use of hyperlipidemia-related medication.                                                                                                                          |
|                                 | 30690                   |                     | Blood cholesterol level Measured by CHO-POD analysis on a Beckman Coulter AU5800 ( $\geq 6.21$ mmol/L).                                                                |
| <b>Family history of stroke</b> | 20107 (code 2)          | Baseline assessment | Illnesses of father. Touchscreen question "Has/did your father ever suffer from? (You can select more than one answer)".                                               |
|                                 | 20110 (code 2)          |                     | Illnesses of mother. Touchscreen question "Has/did your mother ever suffer from? (You can select more than one answer)".                                               |
|                                 | 20111 (code 2)          |                     | Illnesses of siblings. Touchscreen question "Have any of your brothers or sisters suffered from any of the following diseases? (You can select more than one answer)". |
| <b>Body mass index</b>          | 21002                   | Baseline assessment | Weight. Body mass index was computed as weight in kilograms divided by height squared in meters.                                                                       |

|                            |       |                     |                                                                                                                                                                                                                                                          |
|----------------------------|-------|---------------------|----------------------------------------------------------------------------------------------------------------------------------------------------------------------------------------------------------------------------------------------------------|
|                            | 12144 | Baseline assessment | Height. Body mass index was computed as weight in kilograms divided by height squared in meters.                                                                                                                                                         |
| Demographic information    |       |                     |                                                                                                                                                                                                                                                          |
| Age                        | 21003 | Baseline assessment | Refer to the age of the participant on the day they attended an Assessment Centre, year.                                                                                                                                                                 |
| Sex                        | 31    | Baseline assessment | Sex of participant.                                                                                                                                                                                                                                      |
| Ethnic background          | 21000 | Baseline assessment | Recorded as white and non-white.                                                                                                                                                                                                                         |
| Education attainment       | 6138  | Baseline assessment | Touchscreen question "Which of the following qualifications do you have? (You can select more than one)".                                                                                                                                                |
| Townsend deprivation index | 189   | Baseline assessment | Townsend deprivation index calculated immediately prior to participant joining UK Biobank based on the preceding national census output areas. Each participant is assigned a score corresponding to the output area in which their postcode is located. |
| Physical activity levels   | 22036 | Baseline assessment | Indicates whether a person met the 2017 UK Physical activity guidelines of 150 minutes of walking or moderate activity per week or 75 minutes of vigorous activity.                                                                                      |

**Supplemental Table 2.** Multivariable-adjusted hazard ratios (95% confidence interval) for the association of hs-CRP and incident retinal artery occlusion, ischemic stroke, and transient ischemic attack stratified by gender and age.

|        |           | Retinal Artery Occlusion |                          | Ischemic Stroke         |                          | Transient Ischemic Attack |                          |
|--------|-----------|--------------------------|--------------------------|-------------------------|--------------------------|---------------------------|--------------------------|
|        |           | HR (95%CI)               | <i>P</i> for interaction | HR (95%CI)              | <i>P</i> for interaction | HR (95%CI)                | <i>P</i> for interaction |
| Gender | Female    | 1.26 (0.77-2.06)         | 0.840                    | <b>1.22 (1.09-1.37)</b> | 0.807                    | 1.01 (0.83-1.24)          | 0.134                    |
|        | Male      | 1.38 (0.99-1.92)         |                          | <b>1.26 (1.16-1.35)</b> |                          | <b>1.19 (1.05-1.35)</b>   |                          |
| Age    | <60 years | <b>1.63 (1.13-2.34)</b>  | 0.202                    | <b>1.29 (1.13-1.47)</b> | 0.172                    | <b>1.60 (1.30-1.99)</b>   | 0.149                    |
|        | ≥60 years | 1.17 (0.77-1.78)         |                          | <b>1.25 (1.16-1.34)</b> |                          | 1.06 (0.83-1.35)          |                          |

Abbreviations: hs-CRP (high-sensitivity C-reactive protein). The model is adjusted for age, gender, ethnicity, education, Townsend deprivation index, physical activity, body mass index, cigarette smoking, alcohol drinking, family history of stroke, diabetes mellitus, hypertension, and hyperlipidemia.

**BOLDED** items are significant statistically significant (*P* < 0.05).

**Supplemental Table 3.** Multivariable-adjusted hazard ratios (95% confidence interval) for the association of hs-CRP and incident retinal artery occlusion, ischemic stroke, and transient ischemic attack after excluding individuals who had a prior history of related brain, cardiovascular diseases, and eye diseases.

| CRP concentration |        | Incident Retinal Artery Occlusion (n=102) |                         | Incident Ischemic Stroke (n=2,680) |                         | Incident Transient Ischemic Attack (n=1,254) |                         |
|-------------------|--------|-------------------------------------------|-------------------------|------------------------------------|-------------------------|----------------------------------------------|-------------------------|
|                   |        | Model 1                                   | Model 2                 | Model 1                            | Model 2                 | Model 1                                      | Model 2                 |
| per 10 mg/L       |        | 1.07 (0.71-1.63)                          | 1.03 (0.61-1.74)        | <b>1.35 (1.28-1.42)</b>            | <b>1.24 (1.16-1.33)</b> | <b>1.25 (1.14-1.37)</b>                      | 1.13 (1.00-1.27)        |
| category          | low    | reference                                 | reference               | reference                          | reference               | reference                                    | reference               |
|                   | median | <b>2.19 (1.31-3.68)</b>                   | <b>1.93 (1.06-3.52)</b> | <b>1.44 (1.30-1.60)</b>            | 1.10 (0.98-1.24)        | <b>1.34 (1.15-1.55)</b>                      | 1.07 (0.91-1.27)        |
|                   | high   | 1.70 (0.99-2.92)                          | 1.27 (0.64-2.51)        | <b>2.01 (1.82-2.21)</b>            | <b>1.45 (1.29-1.63)</b> | <b>1.75 (1.52-2.01)</b>                      | <b>1.32 (1.17-1.57)</b> |

Abbreviations: hs-CRP (high-sensitivity C-reactive protein). Model 1 is the crude model; Model 2 is adjusted for age, gender, ethnicity, education, Townsend deprivation index, physical activity, body mass index, cigarette smoking, alcohol drinking, family history of stroke, diabetes mellitus, hypertension, and hyperlipidemia.

**BOLDED** items are significant statistically significant (P < 0.05).

**Supplemental Table 4.** Multivariable-adjusted hazard ratios (95% confidence interval) for the association of hs-CRP and incident retinal artery occlusion, ischemic stroke and transient ischemic attack after excluding participants with hs-CRP levels more than 10 mg/L.

| CRP concentration |        | Incident Retinal Artery Occlusion (n=125) |                  | Incident Ischemic Stroke (n=2,996) |                         | Incident Transient Ischemic Attack (n=1,414) |                         |
|-------------------|--------|-------------------------------------------|------------------|------------------------------------|-------------------------|----------------------------------------------|-------------------------|
|                   |        | Model 1                                   | Model 2          | Model 1                            | Model 2                 | Model 1                                      | Model 2                 |
| per 10 mg/L       |        | <b>1.19 (0.47-3.02)</b>                   | 0.56 (0.16-2.02) | <b>3.30 (2.81-3.87)</b>            | <b>2.25 (1.83-2.76)</b> | <b>2.77 (2.18-3.52)</b>                      | <b>1.98 (1.46-2.68)</b> |
| category          | low    | reference                                 | reference        | reference                          | reference               | reference                                    | reference               |
|                   | median | <b>1.89 (1.20-2.96)</b>                   | 1.53 (0.91-2.54) | <b>1.41 (1.28-1.55)</b>            | 1.08 (0.97-1.21)        | <b>1.40 (1.22-1.60)</b>                      | 1.51 (0.99-1.34)        |
|                   | high   | <b>1.61 (1.00-2.59)</b>                   | 1.12 (0.62-2.00) | <b>1.96 (1.79-2.15)</b>            | <b>1.41 (1.27-1.58)</b> | <b>1.81 (1.59-2.07)</b>                      | <b>1.43 (1.22-1.67)</b> |

Abbreviations: CRP (C-reactive protein). Model 1 is the crude model; Model 2 is adjusted for age, gender, ethnicity, education, Townsend deprivation index, physical activity, body mass index, cigarette smoking, alcohol drinking, family history of stroke, diabetes mellitus, hypertension, and hyperlipidemia.

**BOLDED** items are significant statistically significant (P < 0.05).

**Supplemental Table 5.** Multivariable-adjusted odd ratios (95% confidence interval) for the association of hs-CRP and retinal artery occlusion, ischemic stroke, and transient ischemic attack after additional adjustment for statin therapy.

| CRP concentration |        | Incident Retinal Artery Occlusion (n=125) | Incident Ischemic Stroke (n=2,996) | Incident Transient Ischemic Attack (n=1,414) |
|-------------------|--------|-------------------------------------------|------------------------------------|----------------------------------------------|
|                   |        | HR (95% CI)                               | HR (95% CI)                        | HR (95% CI)                                  |
| per 10 mg/L       |        | <b>1.34 (1.02-1.76)</b>                   | <b>1.25 (1.17-1.33)</b>            | <b>1.13 (1.01-1.26)</b>                      |
| category          | low    | reference                                 | reference                          | reference                                    |
|                   | median | 1.54 (0.92-2.56)                          | 1.09 (0.98-1.22)                   | 1.16 (0.99-1.35)                             |
|                   | high   | 1.35 (0.78-2.35)                          | <b>1.49 (1.34-1.66)</b>            | <b>1.43 (1.22-1.67)</b>                      |

Abbreviations: CRP (C-reactive protein). The model is adjusted for age, gender, ethnicity, education, Townsend deprivation index, physical activity, body mass index, cigarette smoking, alcohol drinking, family history of stroke, diabetes mellitus, hypertension, hyperlipidemia, and statin therapy.

**BOLDED** items are significant statistically significant (P < 0.05).

**Supplemental Table 6.** Multivariable-adjusted odd ratios (95% confidence interval) for the association of hs-CRP and retinal artery occlusion, ischemic stroke, and transient ischemic attack in the local Chinese cohort.

| CRP concentration | Retinal Artery Occlusion<br>(n=24) |                  | Ischemic Stroke<br>(n=138) |                  | Transient Ischemic Attack<br>(n=112) |                  |
|-------------------|------------------------------------|------------------|----------------------------|------------------|--------------------------------------|------------------|
|                   | Model 1                            | Model 2          | Model 1                    | Model 2          | Model 1                              | Model 2          |
| per 1 mg/L        | 1.40 (1.14-1.72)                   | 1.43 (1.15-1.78) | 1.17 (1.06-1.30)           | 1.13 (1.03-1.24) | 1.12 (1.03-1.22)                     | 1.06 (0.97-1.16) |

Abbreviations: CRP (C-reactive protein). Model 1 is the crude model; Model 2 is adjusted for age, gender, body mass index, diabetes mellitus, and hypertension.

**BOLDED** items are significant statistically significant (P < 0.05).
